# Supplementary material for: Evaluating the impact of environmental interventions across 2 countries: the International Bikeshare Impacts on Cycling and Collisions Study (IBICCS) Study protocol
Source: PubMed Central journal article supplement (PMC4232659; doi:10.1186/1471-2458-14-1103), 2014-10-25
Supplement: 12889_2014_7221_MOESM1_ESM.pdf [file 12889_2014_7221_MOESM1_ESM.pdf]

4

LANG

**LANGUE D'ENTREVUE**

|          |    |   |      |
|----------|----|---|------|
| N =      |    | 0 | 100% |
| Français | FR | 0 | 0%   |
| Anglais  | EN | 0 | 0%   |
| Espagnol | ES | 0 | 0%   |

5

VILLE

**In which city do you live?**

|                  |     |   |      |
|------------------|-----|---|------|
| N =              |     | 0 | 100% |
| New-York         | 01  | 0 | 0%   |
| Chicago          | 02  | 0 | 0%   |
| Toronto          | 03  | 0 | 0%   |
| Vancouver        | 04  | 0 | 0%   |
| Detroit          | 05  | 0 | 0%   |
| Montreal         | 06  | 0 | 0%   |
| Boston           | 07  | 0 | 0%   |
| Philadelphie     | 08  | 0 | 0%   |
| Other (specify:) | 960 | 0 | 0%   |

12

Q1

**For statistical purposes, can you please provide your postal code or zip code. Please note that this information does not allow for identification of you as an individual but allows us to better understand what part of the city you live in and what kind of services you have access to. Please do not enter any spaces.**

A9A9A9

23

Q46B9

**What is the name of the neighborhood where you live?**

|                  |     |   |      |
|------------------|-----|---|------|
| N =              |     | 0 | 100% |
| Other (Specify:) | 960 | 0 | 0%   |

24

Q42

**How old are you?**

25

Q54

**Are you...?**

|        |   |   |      |
|--------|---|---|------|
| N =    |   | 0 | 100% |
| Female | 1 | 0 | 0%   |
| Male   | 2 | 0 | 0%   |

|        |   |   |    |
|--------|---|---|----|
| Refuse | 9 | 0 | 0% |
|--------|---|---|----|

**26** **Q43**

**What language do you most often speak at home?**

|                |     |   |      |
|----------------|-----|---|------|
| N =            |     | 0 | 100% |
| English        | 01  | 0 | 0%   |
| French         | 02  | 0 | 0%   |
| Spanish        | 03  | 0 | 0%   |
| Other, specify | 960 | 0 | 0%   |
| Refuse         | 99  | 0 | 0%   |

**36** **Q2**

**In this first series of questions, we ask about your current health status. Please indicate the answer that best describes your current state of health. In comparison to other persons your age, would you say that your health in general is...**

|                            |   |   |      |
|----------------------------|---|---|------|
| N =                        |   | 0 | 100% |
| Excellent                  | 1 | 0 | 0%   |
| Very good                  | 2 | 0 | 0%   |
| Good                       | 3 | 0 | 0%   |
| Fair                       | 4 | 0 | 0%   |
| Poor                       | 5 | 0 | 0%   |
| Do not know/Does not apply | 9 | 0 | 0%   |

**37** **Q3B**

**Below is a list of symptoms and conditions. For each one, please indicate whether or not a medical doctor, nurse or other professional had ever told you that you suffer from this symptom or condition.**

Hypertension

|                            |   |   |      |
|----------------------------|---|---|------|
| N =                        |   | 0 | 100% |
| Yes                        | 1 | 0 | 0%   |
| No                         | 2 | 0 | 0%   |
| Do not know/Does not apply | 3 | 0 | 0%   |

**38** **Q3C**

**Below is a list of symptoms and conditions. For each one, please indicate whether or not a medical doctor, nurse or other professional had ever told you that you suffer from this symptom or condition.**

High cholesterol

|     |   |   |      |
|-----|---|---|------|
| N = |   | 0 | 100% |
| Yes | 1 | 0 | 0%   |
| No  | 2 | 0 | 0%   |

Do not know/Does not apply 3 0 0%

**39**

**Q3D**

**Below is a list of symptoms and conditions. For each one, please indicate whether or not a medical doctor, nurse or other professional had ever told you that you suffer from this symptom or condition.**

Diabetes

|     |   |   |      |
|-----|---|---|------|
| N = |   | 0 | 100% |
| Yes | 1 | 0 | 0%   |
| No  | 2 | 0 | 0%   |

**40**

**Q3E**

**Below is a list of symptoms and conditions. For each one, please indicate whether or not a medical doctor, nurse or other professional had ever told you that you suffer from this symptom or condition.**

Cardiac problems (angina, heart attack/myocardial infarction, by-pass)

|                            |   |   |      |
|----------------------------|---|---|------|
| N =                        |   | 0 | 100% |
| Yes                        | 1 | 0 | 0%   |
| No                         | 2 | 0 | 0%   |
| Do not know/Does not apply | 3 | 0 | 0%   |

**41**

**Q3F**

**Below is a list of symptoms and conditions. For each one, please indicate whether or not a medical doctor, nurse or other professional had ever told you that you suffer from this symptom or condition.**

Arthritis/ or rheumatism

|                            |   |   |      |
|----------------------------|---|---|------|
| N =                        |   | 0 | 100% |
| Yes                        | 1 | 0 | 0%   |
| No                         | 2 | 0 | 0%   |
| Do not know/Does not apply | 3 | 0 | 0%   |

**42**

**Q3G**

**Below is a list of symptoms and conditions. For each one, please indicate whether or not a medical doctor, nurse or other professional had ever told you that you suffer from this symptom or condition.**

Respiratory illness (asthma, COPD-Chronic Obstructive Pulmonary Disease)

|                            |   |   |      |
|----------------------------|---|---|------|
| N =                        |   | 0 | 100% |
| Yes                        | 1 | 0 | 0%   |
| No                         | 2 | 0 | 0%   |
| Do not know/Does not apply | 3 | 0 | 0%   |

43

Q3H

Below is a list of symptoms and conditions. For each one, please indicate whether or not a medical doctor, nurse or other professional had ever told you that you suffer from this symptom or condition.

Depression

|                            |   |   |      |
|----------------------------|---|---|------|
| N =                        |   | 0 | 100% |
| Yes                        | 1 | 0 | 0%   |
| No                         | 2 | 0 | 0%   |
| Do not know/Does not apply | 3 | 0 | 0%   |

44

Q3I

Below is a list of symptoms and conditions. For each one, please indicate whether or not a medical doctor, nurse or other professional had ever told you that you suffer from this symptom or condition.

Back or neck problems

|                            |   |   |      |
|----------------------------|---|---|------|
| N =                        |   | 0 | 100% |
| Yes                        | 1 | 0 | 0%   |
| No                         | 2 | 0 | 0%   |
| Do not know/Does not apply | 3 | 0 | 0%   |

45

Q4

In this next series of questions, we ask about your knowledge of a specific service which is being implemented in many North American cities. Public bicycle share programs are public bicycle systems, often operated through the City, that give people access to bikes for temporary travel around a city. The bikes are often stationed at docking stations throughout the busiest downtown areas. Here are the names of some of these programs in North America and in Europe: Velib in Paris France, Boris Bikes in London England, BIXI bikes in Montreal and Toronto Canada, Capital Bike Share in Washington DC, Nice Ride in Minneapolis Minnesota, Hubway in Boston Massachusetts, Bike Share in NYC EcoBici in Mexico City

Have you heard about one or more of these bike share programs?

|                            |   |   |      |
|----------------------------|---|---|------|
| N =                        |   | 0 | 100% |
| Yes                        | 1 | 0 | 0%   |
| No                         | 2 | 0 | 0%   |
| Do not know/Does not apply | 9 | 0 | 0%   |

46

Q5

Have you ever used one of these public share bicycles in the city in which you live?

|     |  |   |      |
|-----|--|---|------|
| N = |  | 0 | 100% |
|-----|--|---|------|

|                            |   |   |    |
|----------------------------|---|---|----|
| Yes                        | 1 | 0 | 0% |
| No                         | 2 | 0 | 0% |
| Do not know/Does not apply | 9 | 0 | 0% |

**47**

**Q6**

**Please indicate how many times per day, per week, per month or per year have you used these public rented bicycles? Please do not fill out or check more than one box.**

|         |     |   |      |
|---------|-----|---|------|
| N =     |     | 0 | 100% |
| Per day | 1DI | 0 | 0%   |

**48**

**Q6A**

**...Per day**

|                      |  |       |      |
|----------------------|--|-------|------|
| Mean =               |  | 0.000 |      |
| Standard deviation = |  | 0.000 |      |
| N =                  |  | 0     | 100% |

**49**

**Q6B**

**...Per week**

|                      |  |       |      |
|----------------------|--|-------|------|
| Mean =               |  | 0.000 |      |
| Standard deviation = |  | 0.000 |      |
| N =                  |  | 0     | 100% |

**50**

**Q6C**

**...Per month**

|                      |  |       |      |
|----------------------|--|-------|------|
| Mean =               |  | 0.000 |      |
| Standard deviation = |  | 0.000 |      |
| N =                  |  | 0     | 100% |

**51**

**Q6D**

**...Per year**

|                      |  |       |      |
|----------------------|--|-------|------|
| Mean =               |  | 0.000 |      |
| Standard deviation = |  | 0.000 |      |
| N =                  |  | 0     | 100% |

**56**

**Q7**

**For how many minutes or hours did you use these bikes on average per trip? Please do not fill out or check more than one box.**

|         |     |   |      |
|---------|-----|---|------|
| N =     |     | 0 | 100% |
| Minutes | 1DI | 0 | 0%   |

**57** **Q7A**

**...in minutes?**

|                      |  |       |      |
|----------------------|--|-------|------|
| Mean =               |  | 0.000 |      |
| Standard deviation = |  | 0.000 |      |
| N =                  |  | 0     | 100% |

**58** **Q7B**

**...in hours?**

|                      |  |       |      |
|----------------------|--|-------|------|
| Mean =               |  | 0.000 |      |
| Standard deviation = |  | 0.000 |      |
| N =                  |  | 0     | 100% |

**59** **Q7C**

|                     |   |   |      |
|---------------------|---|---|------|
| N =                 |   | 0 | 100% |
| Don't know/Not sure | 3 | 0 | 0%   |
| Refused             | 9 | 0 | 0%   |

**63** **Q8**

**When you used these bicycles what type of trip did it normally involve? (Check all that apply)**

|                                     |     |   |    |
|-------------------------------------|-----|---|----|
| Getting to work or school           | 01  | 0 | 0% |
| For leisure or fun                  | 02  | 0 | 0% |
| For exercise                        | 03  | 0 | 0% |
| To do shopping or run other errands | 04  | 0 | 0% |
| To meet with family or friends      | 05  | 0 | 0% |
| Trips for work                      | 06  | 0 | 0% |
| Other, please specify               | 96O | 0 | 0% |
| Do not know/Does not apply          | 99X | 0 | 0% |

**64** **Q9**

**What type of transportation would you have used to make these trips if these public share bicycles were not available? (Check all that apply)**

|                                                 |     |   |    |
|-------------------------------------------------|-----|---|----|
| Personal bike                                   | 01  | 0 | 0% |
| Walk                                            | 02  | 0 | 0% |
| Public transit                                  | 03  | 0 | 0% |
| Taxi                                            | 04  | 0 | 0% |
| Motor vehicle (own, rented, borrowed, car pool) | 05  | 0 | 0% |
| Other, please specify                           | 96O | 0 | 0% |
| Do not know/Does not apply                      | 99X | 0 | 0% |

**65**

**Q10**

**Which of the following modes of transportation do you integrate into your travel when you use public share bicycles? (Check all that apply)**

|                            |     |   |      |
|----------------------------|-----|---|------|
| N =                        |     | 0 | 100% |
| Public transit             | 01  | 0 | 0%   |
| Motor vehicle              | 02  | 0 | 0%   |
| Taxi                       | 03  | 0 | 0%   |
| Other, please specify      | 96O | 0 | 0%   |
| None of the above          | 98X | 0 | 0%   |
| Do not know/Does not apply | 99X | 0 | 0%   |

**66**

**Q11**

**If public bicycles share were located within a 10-minute walk from your home, workplace or school, how likely would you be to rent a public share bicycle?**

|                                 |   |   |    |
|---------------------------------|---|---|----|
| Very likely                     | 1 | 0 | 0% |
| Somewhat likely                 | 2 | 0 | 0% |
| Somewhat unlikely               | 3 | 0 | 0% |
| Totally unlikely                | 4 | 0 | 0% |
| Don't know                      | 5 | 0 | 0% |
| I already use public bike share | 9 | 0 | 0% |

**67**

**Q12**

**Which of the following reasons best represent why you are *q11*? (Check all that apply)**

|                                                       |    |   |    |
|-------------------------------------------------------|----|---|----|
| Prefer to ride your own bicycle                       | 01 | 0 | 0% |
| Cycling is unsafe                                     | 02 | 0 | 0% |
| The cost of renting a public bicycle is too expensive | 03 | 0 | 0% |
| Public bicycle does not offer helmet rentals          | 04 | 0 | 0% |
| A credit card is required to rent a public bicycle    | 05 | 0 | 0% |
| A security deposit (on a credit card) is              | 06 | 0 | 0% |

|                                                              |     |   |    |
|--------------------------------------------------------------|-----|---|----|
| required to rent a public bicycle                            |     |   |    |
| My destination is too far                                    | 07  | 0 | 0% |
| I am not interested in cycling                               | 08  | 0 | 0% |
| Public bicycle time restrictions                             | 09  | 0 | 0% |
| There are not enough public bicycles at each docking station | 10  | 0 | 0% |
| Other types of transportation are more convenient            | 11  | 0 | 0% |
| Other, please specify                                        | 96O | 0 | 0% |
| None of the above                                            | 98X | 0 | 0% |
| Don't know                                                   | 99X | 0 | 0% |

68

Q13

**Overall, which mode of transportation do you use most often to get around?**

|                                                 |     |   |    |
|-------------------------------------------------|-----|---|----|
| Personal bike                                   | 01  | 0 | 0% |
| Public bicycle share                            | 02  | 0 | 0% |
| Walk                                            | 03  | 0 | 0% |
| Bus, subway, train                              | 04  | 0 | 0% |
| Taxi                                            | 05  | 0 | 0% |
| Motor vehicle (own, rented, borrowed, car pool) | 06  | 0 | 0% |
| Not applicable                                  | 97  | 0 | 0% |
| Other, please specify                           | 96O | 0 | 0% |
| Do not know                                     | 99  | 0 | 0% |

69

Q14

**The next few questions are about physical activities other than your regular job duties. During the past month, other than your regular job, did you participate in any physical activities or exercises such as running, calisthenics, golf, gardening, or walking for exercise? ny**

|                            |   |   |      |
|----------------------------|---|---|------|
| N =                        |   | 0 | 100% |
| Yes                        | 1 | 0 | 0%   |
| No                         | 2 | 0 | 0%   |
| Do not know/Does not apply | 8 | 0 | 0%   |
| Refused                    | 9 | 0 | 0%   |

70

Q15

**What type of physical activity or exercise did you spend the most time doing during the past month? ny**

|                                                         |    |   |    |
|---------------------------------------------------------|----|---|----|
| Active Gaming Devices (Wii Fit, Dance Dance revolution) | 01 | 0 | 0% |
|---------------------------------------------------------|----|---|----|

|                                                                       |    |   |    |
|-----------------------------------------------------------------------|----|---|----|
| Aerobics video or class                                               | 02 | 0 | 0% |
| Backpacking                                                           | 03 | 0 | 0% |
| Badminton                                                             | 04 | 0 | 0% |
| Basketball                                                            | 05 | 0 | 0% |
| Bicycling machine exercise                                            | 06 | 0 | 0% |
| Bicycling                                                             | 07 | 0 | 0% |
| Boating (Canoeing, rowing, kayaking, sailing for pleasure or camping) | 08 | 0 | 0% |
| Bowling                                                               | 09 | 0 | 0% |
| Boxing                                                                | 10 | 0 | 0% |
| Calisthenics                                                          | 11 | 0 | 0% |
| Canoeing/rowing in competition                                        | 12 | 0 | 0% |
| Carpentry                                                             | 13 | 0 | 0% |
| Dancing-ballet, ballroom, Latin, hip hop, etc                         | 14 | 0 | 0% |
| Elliptical/EFX machine exercise                                       | 15 | 0 | 0% |
| Fishing from river bank or boat                                       | 16 | 0 | 0% |
| Frisbee                                                               | 17 | 0 | 0% |
| Gardening (spading, weeding, digging, filling)                        | 18 | 0 | 0% |
| Golf (with motorized cart)                                            | 19 | 0 | 0% |
| Golf (without motorized cart)                                         | 20 | 0 | 0% |
| Handball                                                              | 21 | 0 | 0% |
| Hiking - cross-country                                                | 22 | 0 | 0% |
| Hockey                                                                | 23 | 0 | 0% |
| Horseback riding                                                      | 24 | 0 | 0% |
| Hunting large game - deer, elk                                        | 25 | 0 | 0% |
| Hunting small game - quail                                            | 26 | 0 | 0% |
| Inline Skating                                                        | 27 | 0 | 0% |
| Jogging                                                               | 28 | 0 | 0% |
| Lacrosse                                                              | 29 | 0 | 0% |
| Mountain climbing                                                     | 30 | 0 | 0% |
| Mowing lawn                                                           | 31 | 0 | 0% |
| Paddleball                                                            | 32 | 0 | 0% |
| Painting/papering house                                               | 33 | 0 | 0% |
| Pilates                                                               | 34 | 0 | 0% |
| Racquetball                                                           | 35 | 0 | 0% |
| Raking lawn                                                           | 36 | 0 | 0% |
| Running                                                               | 37 | 0 | 0% |
| Rock Climbing                                                         | 38 | 0 | 0% |
| Rope skipping                                                         | 39 | 0 | 0% |
| Rowing machine exercise                                               | 40 | 0 | 0% |
| Rugby                                                                 | 41 | 0 | 0% |
| Scuba diving                                                          | 42 | 0 | 0% |
| Skateboarding                                                         | 43 | 0 | 0% |
| Skating - ice or roller                                               | 44 | 0 | 0% |

|                             |      |   |    |
|-----------------------------|------|---|----|
| Sledding, tobogganing       | 45   | 0 | 0% |
| Snorkeling                  | 46   | 0 | 0% |
| Snow blowing                | 47   | 0 | 0% |
| Snow shoveling by hand      | 48   | 0 | 0% |
| Snow skiing                 | 49   | 0 | 0% |
| Snowshoeing                 | 50   | 0 | 0% |
| Soccer                      | 51   | 0 | 0% |
| Softball/Baseball           | 52   | 0 | 0% |
| Squash                      | 53   | 0 | 0% |
| Stair climbing/Stair master | 54   | 0 | 0% |
| Stream fishing in waders    | 55   | 0 | 0% |
| Surfing                     | 56   | 0 | 0% |
| Swimming                    | 57   | 0 | 0% |
| Swimming in laps            | 58   | 0 | 0% |
| Table tennis                | 59   | 0 | 0% |
| Tai Chi                     | 60   | 0 | 0% |
| Tennis                      | 61   | 0 | 0% |
| Touch football              | 62   | 0 | 0% |
| Volleyball                  | 63   | 0 | 0% |
| Walking                     | 64   | 0 | 0% |
| Waterskiing                 | 65   | 0 | 0% |
| Weight lifting              | 66   | 0 | 0% |
| Wrestling                   | 67   | 0 | 0% |
| Yoga                        | 68   | 0 | 0% |
| Other (Specify:)            | 96DO | 0 | 0% |
| Do not know/Does not apply  | 98   | 0 | 0% |
| Refused                     | 99   | 0 | 0% |

**71**

**Q16**

**How many times per week or per month did you take part in this activity during the past month? Please do not fill out or check more than one box. ny**

|                |     |   |      |
|----------------|-----|---|------|
| N =            |     | 0 | 100% |
| Times per week | 1DI | 0 | 0%   |

**72**

**Q16A**

**per week**

|                      |        |
|----------------------|--------|
| Mean =               | 0.000  |
| Standard deviation = | 0.000  |
| N =                  | 0 100% |

**73**

**Q16B**

**per month**

|                      |       |
|----------------------|-------|
| Mean =               | 0.000 |
| Standard deviation = | 0.000 |

|     |  |   |      |
|-----|--|---|------|
| N = |  | 0 | 100% |
|-----|--|---|------|

| 74                         |   | Q16C |      |
|----------------------------|---|------|------|
| N =                        |   | 0    | 100% |
| Do not know/Does not apply | 8 | 0    | 0%   |
| Refused                    | 9 | 0    | 0%   |

| 75                                                                                               |     | TQ16A |      |
|--------------------------------------------------------------------------------------------------|-----|-------|------|
| <b>Please do not fill out or check more than one box. Click on "Next" to revise your answer.</b> |     |       |      |
| N =                                                                                              |     | 0     | 100% |
|                                                                                                  | 1DI | 0     | 0%   |

| 76                                                                                               |     | TQ16B |      |
|--------------------------------------------------------------------------------------------------|-----|-------|------|
| <b>Please do not fill out or check more than one box. Click on "Next" to revise your answer.</b> |     |       |      |
| N =                                                                                              |     | 0     | 100% |
|                                                                                                  | 1DI | 0     | 0%   |

| 78                                                                                                                  |     | Q17 |      |
|---------------------------------------------------------------------------------------------------------------------|-----|-----|------|
| <b>And when you took part in this activity, for how many minutes or hours did you usually keep at it? <i>ny</i></b> |     |     |      |
| N =                                                                                                                 |     | 0   | 100% |
| Minutes                                                                                                             | 1DI | 0   | 0%   |

| 79                   |  | Q17A  |      |
|----------------------|--|-------|------|
| <b>Hours</b>         |  |       |      |
| Mean =               |  | 0.000 |      |
| Standard deviation = |  | 0.000 |      |
| N =                  |  | 0     | 100% |

| 80                         |    | Q17B  |      |
|----------------------------|----|-------|------|
| <b>Minutes</b>             |    |       |      |
| Mean =                     |    | 0.000 |      |
| Standard deviation =       |    | 0.000 |      |
| N =                        |    | 0     | 100% |
| Do not know/Does not apply | 98 | 0     | 0%   |
| Refused                    | 99 | 0     | 0%   |

| 83 |  | Q18 |  |
|----|--|-----|--|
|----|--|-----|--|

**What other type of physical activity gave you the next most exercise during the past month? ny**

|                                                                            |    |   |    |
|----------------------------------------------------------------------------|----|---|----|
| Active Gaming Devices (Wii Fit, Dance<br>Dance revolution)                 | 01 | 0 | 0% |
| Aerobics video or class                                                    | 02 | 0 | 0% |
| Backpacking                                                                | 03 | 0 | 0% |
| Badminton                                                                  | 04 | 0 | 0% |
| Basketball                                                                 | 05 | 0 | 0% |
| Bicycling machine exercise                                                 | 06 | 0 | 0% |
| Bicycling                                                                  | 07 | 0 | 0% |
| Boating (Canoeing, rowing,<br>kayaking,sailing for pleasure or<br>camping) | 08 | 0 | 0% |
| Bowling                                                                    | 09 | 0 | 0% |
| Boxing                                                                     | 10 | 0 | 0% |
| Calisthenics                                                               | 11 | 0 | 0% |
| Canoeing/rowing in competition                                             | 12 | 0 | 0% |
| Carpentry?                                                                 | 13 | 0 | 0% |
| Dancing-ballet, ballroom, Latin, hip hop,<br>etc                           | 14 | 0 | 0% |
| Elliptical/EFX machine exercise                                            | 15 | 0 | 0% |
| Fishing from river bank or boat?                                           | 16 | 0 | 0% |
| Frisbee?                                                                   | 17 | 0 | 0% |
| Gardening (spading, weeding, digging,<br>filling)                          | 18 | 0 | 0% |
| Golf (with motorized cart)                                                 | 19 | 0 | 0% |
| Golf (without motorized cart)                                              | 20 | 0 | 0% |
| Handball                                                                   | 21 | 0 | 0% |
| Hiking - cross-country                                                     | 22 | 0 | 0% |
| Hockey                                                                     | 23 | 0 | 0% |
| Horseback riding                                                           | 24 | 0 | 0% |
| Hunting large game - deer, elk                                             | 25 | 0 | 0% |
| Hunting small game - quail                                                 | 26 | 0 | 0% |
| Inline Skating                                                             | 27 | 0 | 0% |
| Jogging                                                                    | 28 | 0 | 0% |
| Lacrosse                                                                   | 29 | 0 | 0% |
| Mountain climbing                                                          | 30 | 0 | 0% |
| Mowing lawn                                                                | 31 | 0 | 0% |
| Paddleball                                                                 | 32 | 0 | 0% |
| Painting/papering house                                                    | 33 | 0 | 0% |
| Pilates                                                                    | 34 | 0 | 0% |
| Racquetball                                                                | 35 | 0 | 0% |
| Raking lawn                                                                | 36 | 0 | 0% |

|                             |      |   |    |
|-----------------------------|------|---|----|
| Running                     | 37   | 0 | 0% |
| Rock Climbing               | 38   | 0 | 0% |
| Rope skipping               | 39   | 0 | 0% |
| Rowing machine exercise     | 40   | 0 | 0% |
| Rugby                       | 41   | 0 | 0% |
| Scuba diving                | 42   | 0 | 0% |
| Skateboarding               | 43   | 0 | 0% |
| Skating - ice or roller     | 44   | 0 | 0% |
| Sledding, tobogganing       | 45   | 0 | 0% |
| Snorkeling                  | 46   | 0 | 0% |
| Snow blowing                | 47   | 0 | 0% |
| Snow shoveling by hand      | 48   | 0 | 0% |
| Snow skiing                 | 49   | 0 | 0% |
| Snowshoeing                 | 50   | 0 | 0% |
| Soccer                      | 51   | 0 | 0% |
| Softball/Baseball           | 52   | 0 | 0% |
| Squash                      | 53   | 0 | 0% |
| Stair climbing/Stair master | 54   | 0 | 0% |
| Stream fishing in waders    | 55   | 0 | 0% |
| Surfing                     | 56   | 0 | 0% |
| Swimming                    | 57   | 0 | 0% |
| Swimming in laps            | 58   | 0 | 0% |
| Table tennis                | 59   | 0 | 0% |
| Tai Chi                     | 60   | 0 | 0% |
| Tennis                      | 61   | 0 | 0% |
| Touch football              | 62   | 0 | 0% |
| Volleyball                  | 63   | 0 | 0% |
| Walking                     | 64   | 0 | 0% |
| Waterskiing                 | 65   | 0 | 0% |
| Weight lifting              | 66   | 0 | 0% |
| Wrestling                   | 67   | 0 | 0% |
| Yoga                        | 68   | 0 | 0% |
| Other (Specify:)            | 96DO | 0 | 0% |
| No other activity           | 97   | 0 | 0% |
| Do not know/Does not apply  | 98   | 0 | 0% |
| Refused                     | 99   | 0 | 0% |

**84**

**Q19**

**How many times per week or per month did you take part in this activity during the past month? Please do not fill out or check more than one box. ny**

|          |     |   |      |
|----------|-----|---|------|
| N =      |     | 0 | 100% |
| per week | 1DI | 0 | 0%   |

**85**

**Q19A**

**Per week**

|        |       |
|--------|-------|
| Mean = | 0.000 |
|--------|-------|

|                      |  |       |      |
|----------------------|--|-------|------|
| Standard deviation = |  | 0.000 |      |
| N =                  |  | 0     | 100% |

**86** **Q19B**

**Per month**

|                      |  |       |      |
|----------------------|--|-------|------|
| Mean =               |  | 0.000 |      |
| Standard deviation = |  | 0.000 |      |
| N =                  |  | 0     | 100% |

**87** **Q19C**

|                            |   |   |      |
|----------------------------|---|---|------|
| N =                        |   | 0 | 100% |
| Do not know/Does not apply | 8 | 0 | 0%   |
| Refused                    | 9 | 0 | 0%   |

**91** **Q20**

**And when you took part in this activity, for how many minutes or hours did you usually keep at it? *ny***

|         |     |   |      |
|---------|-----|---|------|
| N =     |     | 0 | 100% |
| Minutes | 1DI | 0 | 0%   |

**92** **Q20A**

**Hours**

|                      |  |       |      |
|----------------------|--|-------|------|
| Mean =               |  | 0.000 |      |
| Standard deviation = |  | 0.000 |      |
| N =                  |  | 0     | 100% |

**93** **Q20B**

**Minutes**

|                      |  |       |      |
|----------------------|--|-------|------|
| Mean =               |  | 0.000 |      |
| Standard deviation = |  | 0.000 |      |
| N =                  |  | 0     | 100% |

**94** **Q20C**

|                            |   |   |    |
|----------------------------|---|---|----|
| Do not know/Does not apply | 8 | 0 | 0% |
| Refused                    | 9 | 0 | 0% |

**98** **Q21**

Now, think about how you traveled from place to place, including to places like work, stores, movies and so on. During the past month, on how many days, on average, did you travel in a motor vehicle like a car, car pool or car share use? *ny*

Days per week

|                            |    |       |      |
|----------------------------|----|-------|------|
| Mean =                     |    | 0.000 |      |
| Standard deviation =       |    | 0.000 |      |
| N =                        |    | 0     | 100% |
| Do not know/Does not apply | 98 | 0     | 0%   |
| Refused                    | 99 | 0     | 0%   |

**99**

**Q22A**

How much time did you usually spend on one of those days traveling in a car, car pool or car share use? Please do not fill out or check more than one box. *ny*

|         |     |   |      |
|---------|-----|---|------|
| N =     |     | 0 | 100% |
| Minutes | 1DI | 0 | 0%   |

**100**

**Q22B**

Hours per day

|                      |  |       |      |
|----------------------|--|-------|------|
| Mean =               |  | 0.000 |      |
| Standard deviation = |  | 0.000 |      |
| N =                  |  | 0     | 100% |

**101**

**Q22C**

Minutes per day

|                      |  |       |      |
|----------------------|--|-------|------|
| Mean =               |  | 0.000 |      |
| Standard deviation = |  | 0.000 |      |
| N =                  |  | 0     | 100% |

**102**

**Q22D**

Hours per week

|                      |  |       |      |
|----------------------|--|-------|------|
| Mean =               |  | 0.000 |      |
| Standard deviation = |  | 0.000 |      |
| N =                  |  | 0     | 100% |

**103**

**Q22E**

Minutes per week

|                      |  |       |      |
|----------------------|--|-------|------|
| Mean =               |  | 0.000 |      |
| Standard deviation = |  | 0.000 |      |
| N =                  |  | 0     | 100% |

**104**

**Q22F**

|     |  |   |      |
|-----|--|---|------|
| N = |  | 0 | 100% |
|-----|--|---|------|

|                            |   |   |    |
|----------------------------|---|---|----|
| Do not know/Does not apply | 7 | 0 | 0% |
| Refused                    | 9 | 0 | 0% |

**108**

**Q23**

**During the past month, on how many days, on average, did you travel in public transit like a train, bus, subway or tram? *ny***

Days per week

|                            |   |       |      |
|----------------------------|---|-------|------|
| Mean =                     |   | 0.000 |      |
| Standard deviation =       |   | 0.000 |      |
| N =                        |   | 0     | 100% |
| Do not know/Does not apply | 8 | 0     | 0%   |
| Refused                    | 9 | 0     | 0%   |

**109**

**Q24**

**How much time did you usually spend on one of those days traveling in public transit like a train, bus, subway or tram? Please do not fill out or check more than one box. *ny***

|               |     |   |      |
|---------------|-----|---|------|
| N =           |     | 0 | 100% |
| Hours per day | 1DI | 0 | 0%   |

**110**

**Q24B**

**Hours per day**

|                      |  |       |      |
|----------------------|--|-------|------|
| Mean =               |  | 0.000 |      |
| Standard deviation = |  | 0.000 |      |
| N =                  |  | 0     | 100% |

**111**

**Q24C**

**Minutes per day**

|                      |  |       |      |
|----------------------|--|-------|------|
| Mean =               |  | 0.000 |      |
| Standard deviation = |  | 0.000 |      |
| N =                  |  | 0     | 100% |

**112**

**Q24D**

**Hours per week**

|                      |  |       |      |
|----------------------|--|-------|------|
| Mean =               |  | 0.000 |      |
| Standard deviation = |  | 0.000 |      |
| N =                  |  | 0     | 100% |

**113**

**Q24E**

**Minutes per week**

|                      |  |       |      |
|----------------------|--|-------|------|
| Mean =               |  | 0.000 |      |
| Standard deviation = |  | 0.000 |      |
| N =                  |  | 0     | 100% |

**114****Q24F**

|                            |   |   |      |
|----------------------------|---|---|------|
| N =                        |   | 0 | 100% |
| Do not know/Does not apply | 7 | 0 | 0%   |
| Refused                    | 9 | 0 | 0%   |

**118****Q25**

**Now think only about the walking you did to travel to and from work, to do errands or to go from place to place. Only include walking that you did for at least 10 minutes at a time. During the past month, on how many days, on average, per week did you walk to go from place to place? Days per week. ny**

|                            |   |       |      |
|----------------------------|---|-------|------|
| Mean =                     |   | 0.000 |      |
| Standard deviation =       |   | 0.000 |      |
| N =                        |   | 0     | 100% |
| Do not know/Does not apply | 8 | 0     | 0%   |
| Refused                    | 9 | 0     | 0%   |

**119****Q26**

**How much time did you usually spend on one of those days walking from place to place? Please do not fill out or check more than one box. ny**

|               |     |   |      |
|---------------|-----|---|------|
| N =           |     | 0 | 100% |
| Hours per day | 1DI | 0 | 0%   |

**120****Q26B****Hours per day**

|                      |  |       |      |
|----------------------|--|-------|------|
| Mean =               |  | 0.000 |      |
| Standard deviation = |  | 0.000 |      |
| N =                  |  | 0     | 100% |

**121****Q26C****Minutes per day**

|                      |  |       |      |
|----------------------|--|-------|------|
| Mean =               |  | 0.000 |      |
| Standard deviation = |  | 0.000 |      |
| N =                  |  | 0     | 100% |

**122****Q26D****Hours per week**

|                      |  |       |  |
|----------------------|--|-------|--|
| Mean =               |  | 0.000 |  |
| Standard deviation = |  | 0.000 |  |

|     |  |   |      |
|-----|--|---|------|
| N = |  | 0 | 100% |
|-----|--|---|------|

**123**

**Q26E**

**Minutes per week**

|                      |  |       |      |
|----------------------|--|-------|------|
| Mean =               |  | 0.000 |      |
| Standard deviation = |  | 0.000 |      |
| N =                  |  | 0     | 100% |

**124**

**Q26F**

|                            |   |  |   |      |
|----------------------------|---|--|---|------|
| N =                        |   |  | 0 | 100% |
| Do not know/Does not apply | 7 |  | 0 | 0%   |
| Refused                    | 9 |  | 0 | 0%   |

**128**

**Q27**

**Now think only about the bicycling you did to travel to and from work, to do errands, or to go from place to place. Only include bicycling that you did for at least 10 minutes at a time. During the past month, on how many days, on average, per week did you bicycle to go from place to place? Days per week. ny**

|                            |    |       |      |    |
|----------------------------|----|-------|------|----|
| Mean =                     |    | 0.000 |      |    |
| Standard deviation =       |    | 0.000 |      |    |
| N =                        |    | 0     | 100% |    |
| Do not know/Does not apply | 98 |       | 0    | 0% |
| Refused                    | 99 |       | 0    | 0% |

**129**

**Q28**

**How much time did you usually spend on one of those days to bicycle from place to place? Please do not fill out or check more than one box. ny**

|               |     |  |   |      |
|---------------|-----|--|---|------|
| N =           |     |  | 0 | 100% |
| Hours per day | 1DI |  | 0 | 0%   |

**130**

**Q28B**

**Hours per day**

|                      |  |       |      |
|----------------------|--|-------|------|
| Mean =               |  | 0.000 |      |
| Standard deviation = |  | 0.000 |      |
| N =                  |  | 0     | 100% |

**131**

**Q28C**

**Minutes per day**

|                      |  |       |      |
|----------------------|--|-------|------|
| Mean =               |  | 0.000 |      |
| Standard deviation = |  | 0.000 |      |
| N =                  |  | 0     | 100% |

132

Q28D

**Hours per week**

|                      |  |       |      |
|----------------------|--|-------|------|
| Mean =               |  | 0.000 |      |
| Standard deviation = |  | 0.000 |      |
| N =                  |  | 0     | 100% |

133

Q28E

**Minutes per week**

|                      |  |       |      |
|----------------------|--|-------|------|
| Mean =               |  | 0.000 |      |
| Standard deviation = |  | 0.000 |      |
| N =                  |  | 0     | 100% |

134

Q28F

**How much time did you usually spend on one of those days to bicycle from place to place?**

|                            |   |   |      |
|----------------------------|---|---|------|
| N =                        |   | 0 | 100% |
| Do not know/Does not apply | 7 | 0 | 0%   |
| Refused                    | 9 | 0 | 0%   |

138

Q29

**Overall, how safe do you think bicycling is in your city? Would you say it is...**

|                                   |   |   |      |
|-----------------------------------|---|---|------|
| N =                               |   | 0 | 100% |
| Very safe                         | 1 | 0 | 0%   |
| Somewhat safe                     | 2 | 0 | 0%   |
| Neither safe nor unsafe (neutral) | 3 | 0 | 0%   |
| Somewhat dangerous                | 4 | 0 | 0%   |
| Very dangerous                    | 5 | 0 | 0%   |
| Don't know                        | 9 | 0 | 0%   |

139

Q30A

**There are certain risks associated with cycling. How do the following possible safety issues influence your decision to cycle?**

The risk of injury from car-bike collisions

|                             |   |   |      |
|-----------------------------|---|---|------|
| N =                         |   | 0 | 100% |
| Much less likely to cycle   | 1 | 0 | 0%   |
| Less likely to cycle        | 2 | 0 | 0%   |
| No influence on my decision | 3 | 0 | 0%   |
| More likely to cycle        | 4 | 0 | 0%   |
| Much more likely to cycle   | 5 | 0 | 0%   |
| Don't know                  | 9 | 0 | 0%   |

140

Q30B

**There are certain risks associated with cycling. How do the following possible safety issues influence your decision to cycle?**

The risk of bicycle theft

|                             |   |   |      |
|-----------------------------|---|---|------|
| N =                         |   | 0 | 100% |
| Much less likely to cycle   | 1 | 0 | 0%   |
| Less likely to cycle        | 2 | 0 | 0%   |
| No influence on my decision | 3 | 0 | 0%   |
| More likely to cycle        | 4 | 0 | 0%   |
| Much more likely to cycle   | 5 | 0 | 0%   |
| Don't know                  | 9 | 0 | 0%   |

**141**

**Q30C**

**There are certain risks associated with cycling. How do the following possible safety issues influence your decision to cycle?**

The risk from motorists who don't drive safely near bicycles

|                             |   |   |      |
|-----------------------------|---|---|------|
| N =                         |   | 0 | 100% |
| Much less likely to cycle   | 1 | 0 | 0%   |
| Less likely to cycle        | 2 | 0 | 0%   |
| No influence on my decision | 3 | 0 | 0%   |
| More likely to cycle        | 4 | 0 | 0%   |
| Much more likely to cycle   | 5 | 0 | 0%   |
| Don't know                  | 9 | 0 | 0%   |

**142**

**Q30D**

**There are certain risks associated with cycling. How do the following possible safety issues influence your decision to cycle?**

The risk from cyclists who don't ride safely

|                             |   |   |      |
|-----------------------------|---|---|------|
| N =                         |   | 0 | 100% |
| Much less likely to cycle   | 1 | 0 | 0%   |
| Less likely to cycle        | 2 | 0 | 0%   |
| No influence on my decision | 3 | 0 | 0%   |
| More likely to cycle        | 4 | 0 | 0%   |
| Much more likely to cycle   | 5 | 0 | 0%   |
| Don't know                  | 9 | 0 | 0%   |

**143**

**Q30E**

**There are certain risks associated with cycling. How do the following possible safety issues influence your decision to cycle?**

The route has on-road bicycle lanes on major roads for the entire distance

|                             |   |   |      |
|-----------------------------|---|---|------|
| N =                         |   | 0 | 100% |
| Much less likely to cycle   | 1 | 0 | 0%   |
| Less likely to cycle        | 2 | 0 | 0%   |
| No influence on my decision | 3 | 0 | 0%   |

|                           |   |   |    |
|---------------------------|---|---|----|
| More likely to cycle      | 4 | 0 | 0% |
| Much more likely to cycle | 5 | 0 | 0% |
| Don't know                | 9 | 0 | 0% |

144

Q30F

**There are certain risks associated with cycling. How do the following possible safety issues influence your decision to cycle?**

The route has bike signage and pavement markings on streets

|                             |   |   |      |
|-----------------------------|---|---|------|
| N =                         |   | 0 | 100% |
| Much less likely to cycle   | 1 | 0 | 0%   |
| Less likely to cycle        | 2 | 0 | 0%   |
| No influence on my decision | 3 | 0 | 0%   |
| More likely to cycle        | 4 | 0 | 0%   |
| Much more likely to cycle   | 5 | 0 | 0%   |
| Don't know                  | 9 | 0 | 0%   |

145

Q30G

**There are certain risks associated with cycling. How do the following possible safety issues influence your decision to cycle?**

The route has bicycle paths separated from traffic for the entire distance

|                             |   |   |      |
|-----------------------------|---|---|------|
| N =                         |   | 0 | 100% |
| Much less likely to cycle   | 1 | 0 | 0%   |
| Less likely to cycle        | 2 | 0 | 0%   |
| No influence on my decision | 3 | 0 | 0%   |
| More likely to cycle        | 4 | 0 | 0%   |
| Much more likely to cycle   | 5 | 0 | 0%   |
| Don't know                  | 9 | 0 | 0%   |

146

Q30H

**There are certain risks associated with cycling. How do the following possible safety issues influence your decision to cycle?**

Vehicles drive faster than *m30h*

|                             |   |   |      |
|-----------------------------|---|---|------|
| N =                         |   | 0 | 100% |
| Much less likely to cycle   | 1 | 0 | 0%   |
| Less likely to cycle        | 2 | 0 | 0%   |
| No influence on my decision | 3 | 0 | 0%   |
| More likely to cycle        | 4 | 0 | 0%   |
| Much more likely to cycle   | 5 | 0 | 0%   |
| Don't know                  | 9 | 0 | 0%   |

147

Q31

**In the past month, when using your own bike how often did you wear a helmet?**

|     |  |   |      |
|-----|--|---|------|
| N = |  | 0 | 100% |
|-----|--|---|------|

|                            |   |   |    |
|----------------------------|---|---|----|
| Always                     | 1 | 0 | 0% |
| Often                      | 2 | 0 | 0% |
| Seldom                     | 3 | 0 | 0% |
| Never                      | 4 | 0 | 0% |
| Do not know/Does not apply | 9 | 0 | 0% |

**148**

**Q32**

**In the past month, when using public share bicycles, how often did you wear a helmet?**

|                            |   |   |      |
|----------------------------|---|---|------|
| N =                        |   | 0 | 100% |
| Always                     | 1 | 0 | 0%   |
| Often                      | 2 | 0 | 0%   |
| Seldom                     | 3 | 0 | 0%   |
| Never                      | 4 | 0 | 0%   |
| Do not know/Does not apply | 9 | 0 | 0%   |

**149**

**Q33**

**How many times did you fall off your bike in the past 3 months for any reason?**

|                      |  |       |      |
|----------------------|--|-------|------|
| Mean =               |  | 0.000 |      |
| Standard deviation = |  | 0.000 |      |
| N =                  |  | 0     | 100% |

**150**

**Q34A**

**Have you been involved in a crash in the past 3 months in which you fell off your bike because of ...**

A car door opening in front of you

|                            |   |   |      |
|----------------------------|---|---|------|
| N =                        |   | 0 | 100% |
| Yes                        | 1 | 0 | 0%   |
| No                         | 2 | 0 | 0%   |
| Do not know/Does not apply | 9 | 0 | 0%   |

**151**

**Q34B**

**Have you been involved in a crash in the past 3 months in which you fell off your bike because of ...**

A collision with a motor vehicle (including car, SUV, truck, bus, motorcycle)

|                            |   |   |      |
|----------------------------|---|---|------|
| N =                        |   | 0 | 100% |
| Yes                        | 1 | 0 | 0%   |
| No                         | 2 | 0 | 0%   |
| Do not know/Does not apply | 9 | 0 | 0%   |

**152**

**Q34C**

**Have you been involved in a crash in the past 3 months in which you fell off your bike because of ...**

A collision with another cyclist

|                            |   |   |      |
|----------------------------|---|---|------|
| N =                        |   | 0 | 100% |
| Yes                        | 1 | 0 | 0%   |
| No                         | 2 | 0 | 0%   |
| Do not know/Does not apply | 9 | 0 | 0%   |

**153**

**Q34D**

**Have you been involved in a crash in the past 3 months in which you fell off your bike because of ...**

A collision with a pedestrian

|                            |   |   |      |
|----------------------------|---|---|------|
| N =                        |   | 0 | 100% |
| Yes                        | 1 | 0 | 0%   |
| No                         | 2 | 0 | 0%   |
| Do not know/Does not apply | 9 | 0 | 0%   |

**154**

**Q34E**

**Have you been involved in a crash in the past 3 months in which you fell off your bike because of ...**

An hazard on the road (tracks, pothole, curb)

|                            |   |   |      |
|----------------------------|---|---|------|
| N =                        |   | 0 | 100% |
| Yes                        | 1 | 0 | 0%   |
| No                         | 2 | 0 | 0%   |
| Do not know/Does not apply | 9 | 0 | 0%   |

**155**

**Q34F**

**Have you been involved in a crash in the past 3 months in which you fell off your bike because of ...**

A maneuver to avoid a collision

|                            |   |   |      |
|----------------------------|---|---|------|
| N =                        |   | 0 | 100% |
| Yes                        | 1 | 0 | 0%   |
| No                         | 2 | 0 | 0%   |
| Do not know/Does not apply | 9 | 0 | 0%   |

**156**

**Q34G**

**Have you been involved in a crash in the past 3 months in which you fell off your bike because of ...**

You were distracted

|                            |   |   |      |
|----------------------------|---|---|------|
| N =                        |   | 0 | 100% |
| Yes                        | 1 | 0 | 0%   |
| No                         | 2 | 0 | 0%   |
| Do not know/Does not apply | 9 | 0 | 0%   |

**157****Q34H**

**Have you been involved in a crash in the past 3 months in which you fell off your bike because of ...**

Other type of crash

|                            |   |   |      |
|----------------------------|---|---|------|
| N =                        |   | 0 | 100% |
| Yes                        | 1 | 0 | 0%   |
| No                         | 2 | 0 | 0%   |
| Do not know/Does not apply | 9 | 0 | 0%   |

**158****Q35**

**During your most recent collision in the past 3 months were you injured?**

|                            |   |   |      |
|----------------------------|---|---|------|
| N =                        |   | 0 | 100% |
| Yes                        | 1 | 0 | 0%   |
| No                         | 2 | 0 | 0%   |
| Do not know/Does not apply | 9 | 0 | 0%   |

**159****Q36**

**During your most recent collision in the past 3 months, did you visit an emergency room because you were hurt/injured?**

|                            |   |   |      |
|----------------------------|---|---|------|
| N =                        |   | 0 | 100% |
| Yes                        | 1 | 0 | 0%   |
| No                         | 2 | 0 | 0%   |
| Do not know/Does not apply | 9 | 0 | 0%   |

**160****Q37**

**During your most recent collision in the past 3 months, were you cycling on a cycling lane?**

|                            |   |   |      |
|----------------------------|---|---|------|
| N =                        |   | 0 | 100% |
| Yes                        | 1 | 0 | 0%   |
| No                         | 2 | 0 | 0%   |
| Do not know/Does not apply | 9 | 0 | 0%   |

**161****Q38**

**During your most recent collision in the past 3 month, were you cycling with your own bicycle, a public share bicycle, or a rented/borrowed bicycle?**

|                            |   |   |      |
|----------------------------|---|---|------|
| N =                        |   | 0 | 100% |
| Own                        | 1 | 0 | 0%   |
| Public share bicycle       | 2 | 0 | 0%   |
| Rented/borrowed            | 3 | 0 | 0%   |
| Do not know/Does not apply | 9 | 0 | 0%   |

**162****Q39****During your most recent collision in the past 3 months, were you wearing a helmet?**

|                            |   |   |      |
|----------------------------|---|---|------|
| N =                        |   | 0 | 100% |
| Yes                        | 1 | 0 | 0%   |
| No                         | 2 | 0 | 0%   |
| Do not know/Does not apply | 9 | 0 | 0%   |

**163****Q40**

**These final questions ask about your individual characteristics and will be used for comparison purposes only. All information will remain strictly anonymous. About how tall are you without shoes? Please indicate your height in feet and inches (imperial system) OR in metres and centimetres (metric system).**

|             |     |   |      |
|-------------|-----|---|------|
| N =         |     | 0 | 100% |
| ft / inches | 1DI | 0 | 0%   |

**164****Q40A****Ft**

|                      |  |       |      |
|----------------------|--|-------|------|
| Mean =               |  | 0.000 |      |
| Standard deviation = |  | 0.000 |      |
| N =                  |  | 0     | 100% |

**165****Q40B****Inches**

|                      |  |       |      |
|----------------------|--|-------|------|
| Mean =               |  | 0.000 |      |
| Standard deviation = |  | 0.000 |      |
| N =                  |  | 0     | 100% |

**166****Q40C****Meters**

|                      |  |       |      |
|----------------------|--|-------|------|
| Mean =               |  | 0.000 |      |
| Standard deviation = |  | 0.000 |      |
| N =                  |  | 0     | 100% |

**167****Q40D****Centimeters**

|                      |  |       |      |
|----------------------|--|-------|------|
| Mean =               |  | 0.000 |      |
| Standard deviation = |  | 0.000 |      |
| N =                  |  | 0     | 100% |

**168****Q40E**

|                            |   |   |      |
|----------------------------|---|---|------|
| N =                        |   | 0 | 100% |
| Do not know/Does not apply | 3 | 0 | 0%   |
| Refused                    | 4 | 0 | 0%   |

**172**

**Q41**

**About how much do you weigh without shoes? Please do not fill out or check more than one box.**

|        |     |   |      |
|--------|-----|---|------|
| N =    |     | 0 | 100% |
| Pounds | 1DI | 0 | 0%   |

**173**

**Q41A**

**Pounds**

|                      |  |       |      |
|----------------------|--|-------|------|
| Mean =               |  | 0.000 |      |
| Standard deviation = |  | 0.000 |      |
| N =                  |  | 0     | 100% |

**Kilograms**

|                      |  |       |      |
|----------------------|--|-------|------|
| Mean =               |  | 0.000 |      |
| Standard deviation = |  | 0.000 |      |
| N =                  |  | 0     | 100% |

**175**

**Q41C**

|                            |   |   |      |
|----------------------------|---|---|------|
| N =                        |   | 0 | 100% |
| Do not know/Does not apply | 8 | 0 | 0%   |
| Refused                    | 9 | 0 | 0%   |

**176**

**TQ41A**

**Please do not fill out or check more than one box. Click on "Next" to revise your answer.**

|     |     |   |      |
|-----|-----|---|------|
| N = |     | 0 | 100% |
|     | 1DI | 0 | 0%   |

**177**

**TQ41B**

**Please do not fill out or check more than one box. Click on "Next" to revise your answer.**

|     |     |   |      |
|-----|-----|---|------|
| N = |     | 0 | 100% |
|     | 1DI | 0 | 0%   |

**179**

**Q44**

**Which situation best describes your marital status?**

|     |  |   |      |
|-----|--|---|------|
| N = |  | 0 | 100% |
|-----|--|---|------|

|                                 |     |   |    |
|---------------------------------|-----|---|----|
| Married/Common law relationship | 01  | 0 | 0% |
| Never married                   | 02  | 0 | 0% |
| Separated                       | 03  | 0 | 0% |
| Divorced                        | 04  | 0 | 0% |
| Widowed                         | 05  | 0 | 0% |
| Other, specify...               | 960 | 0 | 0% |
| Refuse                          | 99  | 0 | 0% |

**180**

**Q45**

**How many children aged between 0-17 years old do you have living in your household?**

|                      |   |       |      |
|----------------------|---|-------|------|
| Mean =               |   | 0.000 |      |
| Standard deviation = |   | 0.000 |      |
| N =                  |   | 0     | 100% |
| None                 | 8 | 0     | 0%   |
| Refuse               | 9 | 0     | 0%   |

**181**

**Q46A**

**How long have you lived in your current home residence?**

|                      |  |       |      |
|----------------------|--|-------|------|
| Years                |  |       |      |
| Mean =               |  | 0.000 |      |
| Standard deviation = |  | 0.000 |      |
| N =                  |  | 0     | 100% |

**182**

**Q46B**

|                      |  |       |      |
|----------------------|--|-------|------|
| Months               |  |       |      |
| Mean =               |  | 0.000 |      |
| Standard deviation = |  | 0.000 |      |
| N =                  |  | 0     | 100% |

**183**

**Q46BB**

|                      |  |       |      |
|----------------------|--|-------|------|
| Days                 |  |       |      |
| Mean =               |  | 0.000 |      |
| Standard deviation = |  | 0.000 |      |
| N =                  |  | 0     | 100% |

**184**

**Q46B0**

|        |   |   |      |
|--------|---|---|------|
| N =    |   | 0 | 100% |
| Refuse | 9 | 0 | 0%   |

**186**

**Q46C**

**About how many hours a day do you spend at home including hours when you**

**sleep?**

Hours

|                      |  |       |      |
|----------------------|--|-------|------|
| Mean =               |  | 0.000 |      |
| Standard deviation = |  | 0.000 |      |
| N =                  |  | 0     | 100% |

**187****Q46D****Minutes**

|                      |  |       |      |
|----------------------|--|-------|------|
| Mean =               |  | 0.000 |      |
| Standard deviation = |  | 0.000 |      |
| N =                  |  | 0     | 100% |

**188****Q47****Which of the following groups best describes your ethnic background?**

|                                  |     |   |      |
|----------------------------------|-----|---|------|
| N =                              |     | 0 | 100% |
| White/Caucasian                  | 96  | 0 | 0%   |
| Black/African/African-American   | 2   | 0 | 0%   |
| Hispanic/Latino/Spanish          | 03  | 0 | 0%   |
| Asian/Pacific Islander           | 04  | 0 | 0%   |
| Native American/American Indian  | 05  | 0 | 0%   |
| Arab (Middle East, North Africa) | 06  | 0 | 0%   |
| Indian/Pakistani                 | 07  | 0 | 0%   |
| Other                            | 080 | 0 | 0%   |
| I prefer not to answer           | 09  | 0 | 0%   |

**189****Q48****What country were you born in?**

|               |     |   |      |
|---------------|-----|---|------|
| N =           |     | 0 | 100% |
| Canada        | 01  | 0 | 0%   |
| United States | 02  | 0 | 0%   |
| Other         | 960 | 0 | 0%   |
| Refuse        | 99  | 0 | 0%   |

**190****Q49****Do you have a driver's license?**

|                            |   |   |      |
|----------------------------|---|---|------|
| N =                        |   | 0 | 100% |
| Yes                        | 1 | 0 | 0%   |
| No                         | 2 | 0 | 0%   |
| Do not know/Does not apply | 9 | 0 | 0%   |

**191****Q50**

**Do you have access to a motor vehicle in your household (including car, SUV, truck, motorcycle)?**

|                            |   |   |      |
|----------------------------|---|---|------|
| N =                        |   | 0 | 100% |
| Yes                        | 1 | 0 | 0%   |
| No                         | 2 | 0 | 0%   |
| Do not know/Does not apply | 9 | 0 | 0%   |

**192**

**Q51**

**What is the highest level of education you have completed?**

|                             |     |   |      |
|-----------------------------|-----|---|------|
| N =                         |     | 0 | 100% |
| Less than elementary school | 01  | 0 | 0%   |
| Elementary school           | 02  | 0 | 0%   |
| High school                 | 03  | 0 | 0%   |
| Community College           | 04  | 0 | 0%   |
| Some university             | 05  | 0 | 0%   |
| Completed University        | 06  | 0 | 0%   |
| Graduate Degree             | 07  | 0 | 0%   |
| Other, please specify       | 960 | 0 | 0%   |
| Refuse                      | 99  | 0 | 0%   |

**193**

**Q52A**

**Which of the following best describes your occupational status?**

|                         |     |   |      |
|-------------------------|-----|---|------|
| N =                     |     | 0 | 100% |
| Student                 | 01  | 0 | 0%   |
| Homemaker               | 02  | 0 | 0%   |
| Unemployed seeking work | 03  | 0 | 0%   |
| On disability leave     | 04  | 0 | 0%   |
| On parental leave       | 05  | 0 | 0%   |
| Self-employed           | 06  | 0 | 0%   |
| Part-time employed      | 07  | 0 | 0%   |
| Full-time Employed      | 08  | 0 | 0%   |
| Retired                 | 09  | 0 | 0%   |
| Other, specify          | 960 | 0 | 0%   |
| Refuse                  | 99  | 0 | 0%   |

**194**

**Q52B1**

**What is the name of the neighborhood where you work?**

**203**

**Q52C**

**On an average workday, about how many hours do you spend in your workplace?**

|                      |  |       |
|----------------------|--|-------|
| Hours                |  |       |
| Mean =               |  | 0.000 |
| Standard deviation = |  | 0.000 |

N = 0 100%

**204**

**Q52D**

Minutes

Mean = 0.000

Standard deviation = 0.000

N = 0 100%

**205**

**Q53**

**What is the total yearly income for your entire household before taxes?**

N = 0 100%

Under \$10000 per year 01 0 0%

Between \$10000 and \$19999 per year 02 0 0%

Between \$20000 and \$34999 per year 03 0 0%

Between \$35000 and \$49999 per year 04 0 0%

Between \$50000 and \$74999 per year 05 0 0%

Between \$75000 and \$99999 per year 06 0 0%

Between \$100000 and \$149999 per year 07 0 0%

Between \$150000 and \$199999 per year 08 0 0%

Over \$200000 per year 09 0 0%

Refuse 99 0 0%

Refuse
